# Supplementary material for: Current needs for the improved management of depressive disorder in community healthcare centres, Shenzhen, China: a view from primary care medical leaders
Source: PubMed Central journal article supplement (PMC6598358; doi:10.1186/s13033-019-0300-0), 2019-06-28
Supplement: 13033_2019_300_MOESM1_ESM.pdf [file 13033_2019_300_MOESM1_ESM.pdf]

# Current needs for the improved management of depressive disorder in community healthcare centres, Shenzhen, China: a view from primary care medical leaders

Kendall Searle, Grant Blashki, Ritsuko Kakuma, Hui Yang, Yuanlin Zhao, Harry Minas

## Additional file 1 Theoretical Domains Framework and Discussion Guide

\*Cane J, O'Connor D, Michie S. Validation of the theoretical domains framework for use in behavior change and implementation research. *Implement Sci.* 2012;7:37

| <b>TDF Domains and definitions*</b>                                                                                                                                           | <b>Questions from Phase I Discussion Guide Relating to Each Domain</b>                                                                                                                                                                                 |
|-------------------------------------------------------------------------------------------------------------------------------------------------------------------------------|--------------------------------------------------------------------------------------------------------------------------------------------------------------------------------------------------------------------------------------------------------|
| <b>Knowledge</b><br>An awareness of the existence of something                                                                                                                | Do you ever see patients like this? In what ways are they similar or different to those you generally see?<br>Can you give me a sense for how many you might see in an average working week? And what % of the total number of patients would that be? |
| <b>Optimism</b><br>The confidence that things will happen for the best, or that desired goals will be attained                                                                | What % of these types of patients would you estimate go untreated?<br>Why is that the case?                                                                                                                                                            |
| <b>Beliefs about consequences</b><br>Acceptance of the truth, reality, or validity about outcomes of behavior in a given situation                                            | In your view, are patients like this considered a health priority in your clinic?                                                                                                                                                                      |
| <b>Memory, attention and decision processes</b><br>The ability to retain information, focus selectively on aspects of environment and choose between two or more alternatives | When treating a patient like this, what guidelines (if any) do you usually follow?                                                                                                                                                                     |
| <b>Skills</b><br>An ability or proficiency acquired through practice                                                                                                          | How do you normally assess patients with depressive disorder?<br>How do you normally manage patients with depressive disorder?<br>To whom do you usually refer?<br>How do you normally follow-up patients with depressive disorder?                    |

|                                                                                                                                                                                                                                                 |                                                                                                                                                                                                                                                                                                                                                                                                           |
|-------------------------------------------------------------------------------------------------------------------------------------------------------------------------------------------------------------------------------------------------|-----------------------------------------------------------------------------------------------------------------------------------------------------------------------------------------------------------------------------------------------------------------------------------------------------------------------------------------------------------------------------------------------------------|
| <p><b>Beliefs about capabilities</b></p> <p>Acceptance of the truth, reality, or validity about an ability, talent, or facility that a person can put to constructive use</p>                                                                   | <p>Thinking about the three steps (assessment, management and follow-up) together, what problems have you encountered in patients with depressive disorder?</p>                                                                                                                                                                                                                                           |
| <p><b>Social/professional role and identity</b></p> <p>A coherent set of behaviors and displayed personal qualities of an individual in a social or work setting</p>                                                                            | <p>Generally, speaking, what diagnoses would you consider for a patient like this? What else would you consider?</p>                                                                                                                                                                                                                                                                                      |
| <p><b>Emotion</b></p> <p>A complex reaction pattern, involving experiential, behavioral and psychological elements, by which the individual attempts to deal with a personally significant matter or event</p>                                  | <p>What factors, personal to you, do you think interfere with this intention (to treat depression patients)?</p>                                                                                                                                                                                                                                                                                          |
| <p><b>Environmental context and resources</b></p> <p>Any circumstances of a person's situation or environment that discourages or encourages the development of skills and abilities, independence, social competence and adaptive behavior</p> | <p>What measures if any are available to your clinic to support patients like this?</p> <p>In what ways, does your clinic help or hinder you, when it comes to diagnosing and treating patients like this?</p> <p>In what ways, do your work colleagues help or hinder you in diagnosing and treating patients like this?</p>                                                                             |
| <p><b>Social Influences</b></p> <p>Those interpersonal processes that can cause an individual to change their thoughts, feelings or behaviors</p>                                                                                               | <p>In what ways, (if any) do the attitudes of society in general help or hinder you? And what about the attitudes of the local community?</p> <p>In what ways, does the attitude of the patient help or hinder you? How is patient attitude influenced by their employer/family/friends?</p>                                                                                                              |
| <p><b>Behavioral regulation</b></p> <p>Anything aimed at managing or changing objectively observed or measured actions</p>                                                                                                                      | <p>What health policies (if any) are you aware of, help or hinder you with caring for these types of patients?</p>                                                                                                                                                                                                                                                                                        |
| <p><b>Reinforcement</b></p> <p>Increasing the probability of a response by arranging a dependent relationship, or contingency, between response and given stimulus</p>                                                                          | <p>What would help you to better assess, manage and follow-up this sort of patient?</p> <p>What factors, personal to you, and your working situation, would encourage you to prioritize the care of these patients?</p> <p>If you had to summarize your top three needs, to help you in your role as a primary care leader to improve the treatment of depression in your clinic, what would they be?</p> |
| <p><b>Intentions</b></p> <p>A conscious decision to perform a behavior or a resolve to act in a certain way</p>                                                                                                                                 | <p>Do you generally intend to detect, diagnose and treat depression inpatients attending your clinic?</p>                                                                                                                                                                                                                                                                                                 |
| <p><b>Goals</b></p> <p>Mental representation of outcomes or end states that an individual wants to achieve</p>                                                                                                                                  | <p>With so many responsibilities, do you personally consider depression care to be a priority?</p>                                                                                                                                                                                                                                                                                                        |
